# Supplementary material for: Pronounced Plasticity Caused by Phase Separation and β-relaxation Synergistically in Zr–Cu–Al–Mo Bulk Metallic Glasses
Source: PubMed Central journal article supplement (PMC5430678; doi:10.1038/s41598-017-01283-5), 2017-04-27
Supplement: 41598_2017_1283_MOESM1_ESM.pdf [file 41598_2017_1283_MOESM1_ESM.pdf]

# Supplementary Information

## Pronounced Plasticity Caused by Phase Separation and $\beta$ -relaxation Synergistically in Zr–Cu–Al–Mo Bulk Metallic Glasses

T. Wang,<sup>a</sup> L. Wang,<sup>a</sup> Q. J. Wang,<sup>a</sup> Y.H. Liu,<sup>b</sup> X.D. Hui<sup>a,\*</sup>

<sup>a</sup>State Key Laboratory for Advanced Metals and Materials,  
University of Science and Technology Beijing, Beijing 100083, China  
<sup>b</sup>Institute of Physics, Chinese Academy of Sciences, Beijing 100190, China

### Supplementary Figures

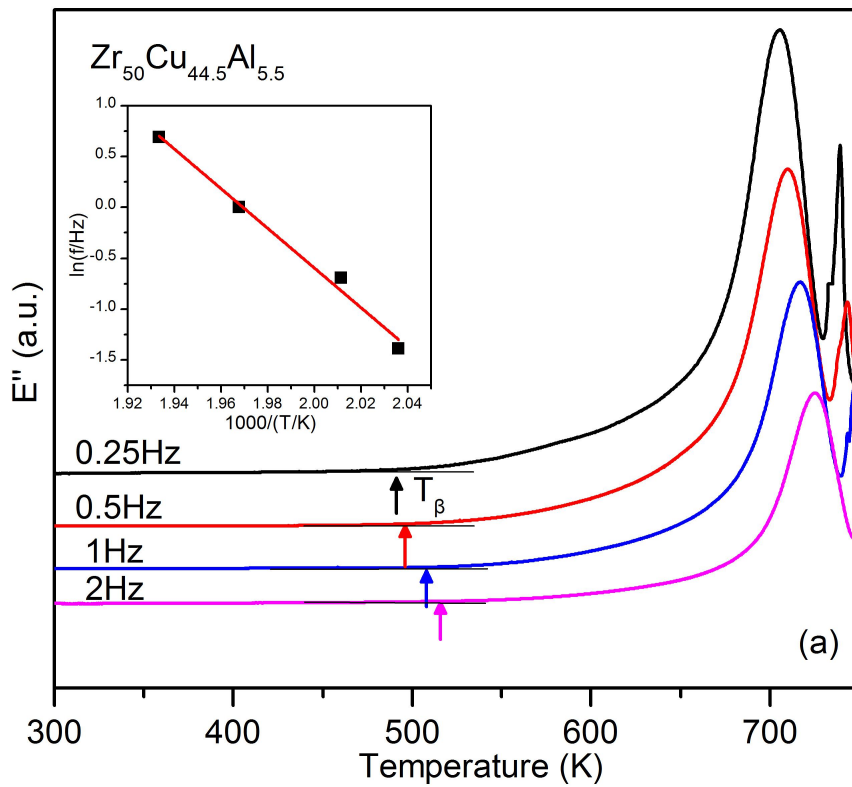

\*Corresponding authors. E-mail: [xdhui@ustb.edu.cn](mailto:xdhui@ustb.edu.cn) (X. D. Hui).

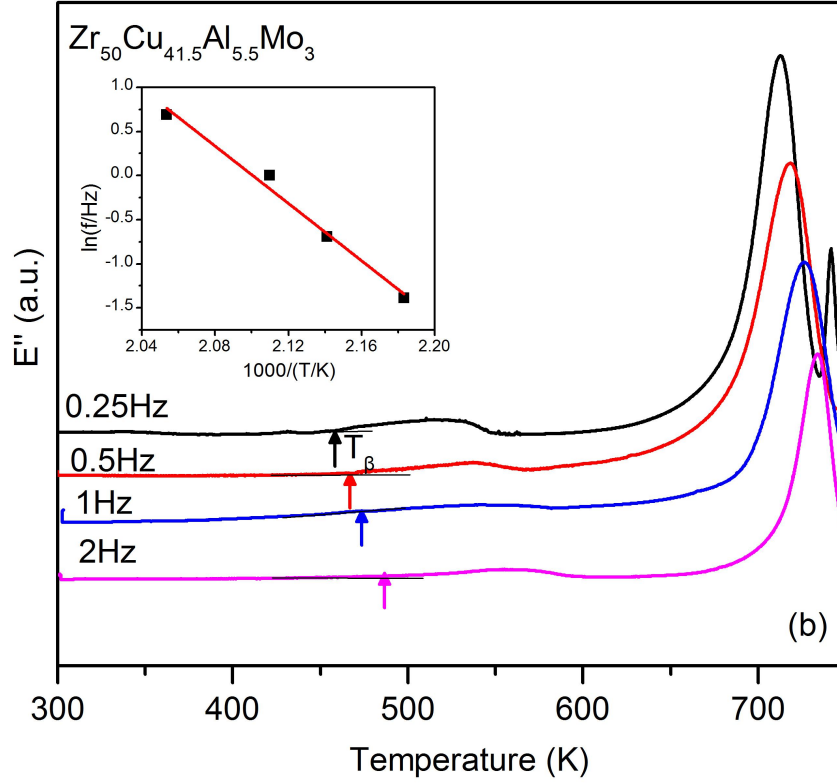

Fig. S1 The temperature dependence on the loss modulus  $E''$  measured with frequency  $f$ , the inset plots are  $\ln(f)$  vs the onset temperature of  $\beta$ -relaxation ( $T_\beta$ ) for the alloys: (a)  $Zr_{50}Cu_{44.5}Al_{5.5}$  (b)  $Zr_{50}Cu_{41.5}Al_{5.5}Mo_3$

### Supplementary Note

The temperature dependence on the  $E''$  as a function of frequency ( $f$ ) is shown in Fig. S1. The inset of Fig. S1 shows the  $f$  dependence on the onset temperature of  $\beta$ -relaxation ( $T_\beta$ ) which is marked on the DMA curver. These points were fitted by the Arrhenius equation

$$f = f_\infty \exp(-E_\beta / RT) \quad (1)$$

Where  $f_\infty$  is the prefactor,  $E_\beta$  is the activation energy of  $\beta$ -relaxation,  $R$  is the ideal gas constant and  $T$  is the temperature. The Eq. (1) can be also written as

$$\ln(f) = \ln(f_\infty) - E_\beta / RT \quad (2)$$

So,  $-E_\beta/R$  is the slope of the line on a plot of  $\ln(f)$  versus  $1/T_\beta$ .

The  $E_\beta$  is determined to be  $162 \pm 12$ kJ/mol and  $135 \pm 11$ kJ/mol for  $Zr_{50}Cu_{44.5}Al_{5.5}$  (ZCA) and  $Zr_{50}Cu_{41.5}Al_{5.5}Mo_3$  (ZCAM3) from the Arrhenius plots, reselectively. And these values are corresponding to  $\Delta E_1$  and  $\Delta E_2$ , reselectively.
